# Supplementary material for: Unveiling the Mg(ii) promoted [3+2] cycloaddition reaction of mesitonitrile oxide to Baylis–Hilman adduct from the molecular electron density theory perspective
Source: Royal Society of Chemistry journal article supplement (doi:10.1039/d2nj05424h), 2022-12-30
Supplement: d2nj05424h1.pdf [file d2nj05424h1.pdf]

## Electronic Supplementary Information

### Unveiling the Mg(II) Promoted [3+2] Cycloaddition Reaction of Mesitronitrile Oxide to Baylis-Hillman Adduct from the Molecular Electron Density Theory Perspective

Luis R. Domingo,\*<sup>1</sup> and Nivedita Acharjee<sup>2</sup>

<sup>1</sup> Department of Organic Chemistry, University of Valencia, Dr. Moliner 50, Burjassot, E-46100 Valencia, Spain.

<sup>2</sup> Department of Chemistry, Durgapur Government College, J. N. Avenue, Durgapur, West Bengal 713214, India.

E-mail: luisrdomingo@gmail.com

### Index

- S2** Figure with the  $\omega$ B97X-D/6-311G(d,p) optimized geometries of **MC-Mg**.
- S3** Table with the  $\omega$ B97X-D/6-311G(d,p) total electronic energies, in the gas phase and toluene, of the stationary points involved in the *zw-type* 32CA reaction of **MNO 9** with **BHA 10**.
- S3** Table with the  $\omega$ B97X-D/6-311G(d,p) enthalpies, entropies, and Gibbs free energies of the stationary points involved in the *zw-type* 32CA reaction of **MNO 9** with **BHA 10**.
- S4** Table with the  $\omega$ B97X-D/6-311G(d,p) total electronic energies, in the gas phase and toluene, of the stationary points involved in the Mg(II)-promoted *zw-type* 32CA reaction of **MNO 9** with **BHA 10**.
- S4** Table with the  $\omega$ B97X-D/6-311G(d,p) enthalpies, entropies, and Gibbs free energies of the stationary points involved in the Mg(II)-promoted *zw-type* 32CA reaction of **MNO 9** with **BHA 10**.
- S5**  $\omega$ B97X-D/6-311G(d,p) gas phase cartesian coordinates of the stationary points involved in the *zw-type* 32CA reaction of **MNO 9** with **BHA 10**
- S15**  $\omega$ B97X-D/6-311G(d,p) gas phase Cartesian coordinates of the stationary points involved in the Mg(II)-promoted *zw-type* 32CA reaction of **MNO 9** with **BHA 10**.

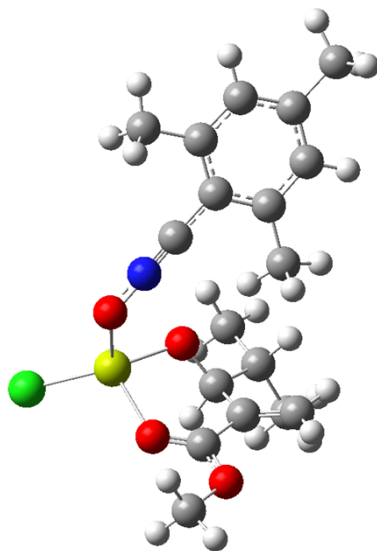

**Figure S1.**  $\omega$ B97X-D/6-311G(d,p) optimized geometries of MC-Mg

**Table S1.**  $\omega$ B97X-D/6-311G(d,p) total electronic energies, in a.u., in the gas phase and toluene, of the stationary points involved in the *zw-type* 32CA reaction of MNO **9** with BHA **10**.

|               | gas phase    | toluene      |
|---------------|--------------|--------------|
| MNO <b>9</b>  | -517.540861  | -517.544284  |
| BHA <b>10</b> | -538.922886  | -538.926314  |
| TS-o-I        | -1056.453708 | -1056.458795 |
| TS-o-II       | -1056.446798 | -1056.453036 |
| TS-m-I        | -1056.445111 | -1056.450280 |
| TS-m-II       | -1056.448570 | -1056.452850 |
| <b>11</b>     | -1056.531794 | -1056.537374 |
| <b>12</b>     | -1056.530424 | -1056.535908 |
| <b>18</b>     | -1056.520022 | -1056.525846 |
| <b>19</b>     | -1056.524436 | -1056.530133 |

**Table S2.**  $\omega$ B97X-D/6-311G(d,p) enthalpies, H in a.u., entropies, S in kcal·mol<sup>-1</sup>K<sup>-1</sup>, and Gibbs free energies, G in a.u., computed in toluene at 80 °C, of the stationary points involved in the *zw-type* 32CA reaction of MNO **9** with BHA **10**.

|               | H            | S     | G            |
|---------------|--------------|-------|--------------|
| MNO <b>9</b>  | -517.339863  | 120.2 | -517.407493  |
| BHA <b>10</b> | -538.693107  | 119.5 | -538.760354  |
| TS-o-I        | -1056.020355 | 191.0 | -1056.127852 |
| TS-o-II       | -1056.014925 | 195.0 | -1056.124674 |
| TS-m-I        | -1056.011953 | 186.9 | -1056.117116 |
| TS-m-II       | -1056.014308 | 187.7 | -1056.119946 |
| <b>11</b>     | -1056.095676 | 189.2 | -1056.202163 |
| <b>12</b>     | -1056.094158 | 188.2 | -1056.200062 |
| <b>18</b>     | -1056.083317 | 180.2 | -1056.184750 |
| <b>19</b>     | -1056.087656 | 182.3 | -1056.190241 |

**Table S3.**  $\omega$ B97X-D/6-311G(d,p) total electronic energies, in a.u., in the gas phase and toluene, of the stationary points involved in the Mg(II)-promoted *zw-type* 32CA reaction of MNO **9** with BHA **10**.

|                   | Gas phase    | DCM          |
|-------------------|--------------|--------------|
| MNO <b>9</b>      | -517.540861  | -517.547007  |
| <b>17</b>         | -1198.748648 | -1198.781181 |
| <b>MC-Mg</b>      | -1716.329156 | -1716.355255 |
| <b>TS-o-I-Mg</b>  | -1716.276377 | -1716.313151 |
| <b>TS-o-II-Mg</b> | -1716.293852 | -1716.321133 |
| <b>TS-m-I-Mg</b>  | -1716.271934 | -1716.306541 |
| <b>TS-m-II-Mg</b> | -1716.294236 | -1716.318767 |
| <b>20</b>         | -1716.355843 | -1716.394622 |
| <b>21</b>         | -1716.372323 | -1716.404258 |
| <b>22</b>         | -1716.351318 | -1716.386410 |
| <b>23</b>         | -1716.371082 | -1716.396808 |

**Table S4.**  $\omega$ B97X-D/6-311G(d,p) enthalpies, H in a.u., entropies, S in kcal·mol<sup>-1</sup>K<sup>-1</sup>, and Gibbs free energies, G in a.u., computed in DCM at r.t., of the stationary points involved in the Mg(II)-promoted *zw-type* 32CA reaction of MNO **9** with BHA **10**.

|                   | H            | S     | G            |
|-------------------|--------------|-------|--------------|
| MNO <b>9</b>      | -517.347098  | 111.6 | -517.400127  |
| <b>17</b>         | -1198.559321 | 126.1 | -1198.619212 |
| <b>MC-Mg</b>      | -1715.932176 | 188.4 | -1716.021708 |
| <b>TS-o-I-Mg</b>  | -1715.891276 | 188.6 | -1715.980871 |
| <b>TS-o-II-Mg</b> | -1715.900129 | 182.3 | -1715.986735 |
| <b>TS-m-I-Mg</b>  | -1715.884243 | 184.5 | -1715.971888 |
| <b>TS-m-II-Mg</b> | -1715.896150 | 179.7 | -1715.981550 |
| <b>20</b>         | -1715.969406 | 176.4 | -1716.053228 |
| <b>21</b>         | -1715.979484 | 179.9 | -1716.064981 |
| <b>22</b>         | -1715.959770 | 178.6 | -1716.044620 |
| <b>23</b>         | -1715.970117 | 180.6 | -1716.055915 |

$\omega$ B97X-D/6-311G(d,p) gas phase Cartesian coordinates of the stationary points involved in the *zw-type* 32CA reaction of MNO **9** with BHA **10**.

**MNO 9**

|   |           |           |           |
|---|-----------|-----------|-----------|
| 8 | -1.339826 | 0.373711  | 1.709563  |
| 7 | -0.218805 | 0.220405  | 1.302436  |
| 6 | 0.861188  | 0.072815  | 0.910576  |
| 6 | 2.194281  | -0.109692 | 0.426720  |
| 6 | 2.766234  | -1.393219 | 0.448804  |
| 6 | 2.909388  | 0.997671  | -0.059014 |
| 6 | 4.062594  | -1.543892 | -0.024713 |
| 6 | 4.203118  | 0.794292  | -0.521699 |
| 6 | 4.795747  | -0.465690 | -0.515221 |
| 1 | 4.514871  | -2.530944 | -0.009238 |
| 1 | 4.765041  | 1.644380  | -0.896513 |
| 6 | 2.283556  | 2.364605  | -0.070367 |
| 1 | 2.970912  | 3.106788  | -0.478206 |
| 1 | 2.003296  | 2.676258  | 0.939954  |
| 1 | 1.372003  | 2.373544  | -0.674910 |
| 6 | 6.187400  | -0.665613 | -1.052731 |
| 1 | 6.709520  | -1.460469 | -0.515916 |
| 1 | 6.779685  | 0.248029  | -0.972575 |
| 1 | 6.153705  | -0.947594 | -2.109858 |
| 6 | 1.987799  | -2.566082 | 0.976634  |
| 1 | 1.068460  | -2.716456 | 0.403306  |
| 1 | 1.695347  | -2.406352 | 2.018439  |
| 1 | 2.576673  | -3.482624 | 0.923978  |

**BHA 10**

|   |           |           |           |
|---|-----------|-----------|-----------|
| 6 | -0.099771 | 0.588005  | 0.142415  |
| 6 | -0.058693 | 1.917157  | 0.147018  |
| 1 | 0.882559  | 2.439518  | 0.281867  |
| 1 | -0.953179 | 2.513566  | 0.018883  |
| 6 | -1.393745 | -0.138805 | -0.007335 |
| 8 | -1.517213 | -1.330872 | 0.169210  |
| 8 | -2.414492 | 0.646319  | -0.353757 |
| 6 | -3.683470 | 0.000374  | -0.472655 |
| 1 | -4.384206 | 0.783789  | -0.751037 |
| 1 | -3.971780 | -0.453702 | 0.476598  |
| 1 | -3.647221 | -0.773193 | -1.241122 |
| 6 | 1.132123  | -0.282746 | 0.315886  |
| 1 | 1.968460  | 0.381005  | 0.562246  |
| 8 | 0.991622  | -1.142231 | 1.428713  |
| 1 | 0.221498  | -1.691409 | 1.246620  |
| 6 | 1.507700  | -1.056415 | -0.965798 |
| 1 | 0.692410  | -1.760952 | -1.169107 |
| 6 | 1.659816  | -0.123799 | -2.167532 |

|   |          |           |           |
|---|----------|-----------|-----------|
| 1 | 2.415541 | 0.644740  | -1.967875 |
| 1 | 0.726276 | 0.385313  | -2.417772 |
| 1 | 1.983699 | -0.685239 | -3.047560 |
| 6 | 2.788720 | -1.855505 | -0.729719 |
| 1 | 3.016374 | -2.486645 | -1.592896 |
| 1 | 2.695904 | -2.489455 | 0.152550  |
| 1 | 3.638588 | -1.181318 | -0.573825 |

**TS-o-I**

|   |           |           |           |
|---|-----------|-----------|-----------|
| 6 | 1.803994  | 0.140630  | -0.153408 |
| 8 | 1.103933  | 0.566677  | 2.081146  |
| 6 | 0.569073  | -0.014631 | -0.720654 |
| 7 | -0.085476 | 0.452912  | 1.797212  |
| 6 | -0.794144 | 0.216750  | 0.854120  |
| 1 | 0.122895  | 0.803252  | -1.271855 |
| 1 | 0.232929  | -1.017335 | -0.963596 |
| 6 | 2.447483  | 1.474929  | -0.084736 |
| 8 | 3.610020  | 1.664911  | 0.168634  |
| 8 | 1.583464  | 2.473960  | -0.346455 |
| 6 | 2.124184  | 3.788830  | -0.245008 |
| 1 | 2.951544  | 3.921678  | -0.944158 |
| 1 | 2.482374  | 3.975649  | 0.768780  |
| 1 | 1.306334  | 4.463689  | -0.489592 |
| 6 | 2.632373  | -1.060135 | 0.262276  |
| 1 | 3.472080  | -0.696501 | 0.866168  |
| 8 | 1.836968  | -1.966192 | 1.013661  |
| 1 | 1.597863  | -1.494300 | 1.816750  |
| 6 | 3.199142  | -1.837718 | -0.933402 |
| 1 | 2.337163  | -2.255371 | -1.470208 |
| 6 | 3.977461  | -0.929438 | -1.885280 |
| 1 | 4.427498  | -1.520675 | -2.686972 |
| 1 | 4.776925  | -0.403289 | -1.356114 |
| 1 | 3.334263  | -0.176428 | -2.348090 |
| 6 | 4.071127  | -2.992956 | -0.442530 |
| 1 | 4.412246  | -3.602793 | -1.283720 |
| 1 | 3.521331  | -3.629542 | 0.251208  |
| 1 | 4.957910  | -2.608263 | 0.073060  |
| 6 | -2.148339 | 0.010046  | 0.404223  |
| 6 | -2.880066 | 1.099957  | -0.092525 |
| 6 | -2.666976 | -1.294049 | 0.390265  |
| 6 | -4.155539 | 0.861053  | -0.586709 |
| 6 | -3.947197 | -1.481932 | -0.116255 |
| 6 | -4.704066 | -0.420023 | -0.605746 |
| 1 | -4.735305 | 1.693596  | -0.973770 |
| 1 | -4.363105 | -2.484763 | -0.135198 |
| 6 | -1.870243 | -2.446199 | 0.939749  |
| 1 | -1.916683 | -2.446357 | 2.033652  |

|   |           |           |           |
|---|-----------|-----------|-----------|
| 1 | -0.812522 | -2.387932 | 0.669616  |
| 1 | -2.268873 | -3.398820 | 0.588092  |
| 6 | -6.098580 | -0.647315 | -1.124498 |
| 1 | -6.829587 | -0.528066 | -0.318603 |
| 1 | -6.213190 | -1.655031 | -1.528561 |
| 1 | -6.352311 | 0.068429  | -1.909082 |
| 6 | -2.303237 | 2.489106  | -0.058430 |
| 1 | -2.889471 | 3.170640  | -0.676445 |
| 1 | -1.265671 | 2.507148  | -0.402255 |
| 1 | -2.302102 | 2.874724  | 0.965796  |

**TS-o-II**

|   |           |           |           |
|---|-----------|-----------|-----------|
| 6 | -1.759492 | 0.062420  | -0.163838 |
| 8 | -1.043537 | 0.604069  | 2.041051  |
| 6 | -0.522458 | -0.186939 | -0.700431 |
| 7 | 0.136752  | 0.396805  | 1.786251  |
| 6 | 0.841438  | 0.068259  | 0.866310  |
| 1 | -0.241420 | -1.216046 | -0.903278 |
| 1 | -0.029307 | 0.572124  | -1.295027 |
| 6 | -2.315445 | 1.441633  | -0.221360 |
| 8 | -3.480471 | 1.730133  | -0.160438 |
| 8 | -1.343205 | 2.364596  | -0.382832 |
| 6 | -1.788218 | 3.717693  | -0.415103 |
| 1 | -0.891302 | 4.319701  | -0.548498 |
| 1 | -2.285001 | 3.977626  | 0.521113  |
| 1 | -2.482643 | 3.878188  | -1.241662 |
| 6 | -2.670165 | -1.084930 | 0.235832  |
| 1 | -2.021439 | -1.979572 | 0.281512  |
| 8 | -3.305979 | -0.885962 | 1.472373  |
| 1 | -2.648975 | -0.515907 | 2.068016  |
| 6 | -3.771407 | -1.373635 | -0.802587 |
| 1 | -4.428894 | -0.500329 | -0.796976 |
| 6 | -3.205767 | -1.569427 | -2.207880 |
| 1 | -4.005565 | -1.843122 | -2.900673 |
| 1 | -2.463780 | -2.376839 | -2.225162 |
| 1 | -2.727360 | -0.665564 | -2.592103 |
| 6 | -4.573951 | -2.599558 | -0.366217 |
| 1 | -5.408342 | -2.774372 | -1.051133 |
| 1 | -4.970254 | -2.466221 | 0.640135  |
| 1 | -3.943061 | -3.496560 | -0.371349 |
| 6 | 2.207365  | -0.112316 | 0.434580  |
| 6 | 2.775000  | -1.395986 | 0.450642  |
| 6 | 2.914748  | 0.996188  | -0.056608 |
| 6 | 4.071998  | -1.546540 | -0.021097 |
| 6 | 4.209299  | 0.794657  | -0.520012 |
| 6 | 4.801347  | -0.465675 | -0.513331 |
| 1 | 4.527185  | -2.532167 | -0.005916 |
| 1 | 4.771228  | 1.644092  | -0.896299 |

|   |          |           |           |
|---|----------|-----------|-----------|
| 6 | 2.297958 | 2.368274  | -0.043171 |
| 1 | 2.885299 | 3.065217  | -0.642645 |
| 1 | 2.253353 | 2.753514  | 0.980344  |
| 1 | 1.271378 | 2.356884  | -0.418176 |
| 6 | 6.191137 | -0.664977 | -1.055439 |
| 1 | 6.715752 | -1.458809 | -0.519801 |
| 1 | 6.782699 | 0.249342  | -0.979751 |
| 1 | 6.151858 | -0.948834 | -2.111801 |
| 6 | 2.001662 | -2.567852 | 0.990008  |
| 1 | 1.049844 | -2.693180 | 0.465954  |
| 1 | 1.766350 | -2.424410 | 2.048228  |
| 1 | 2.570375 | -3.492823 | 0.888169  |

**TS-m-I**

|   |           |           |           |
|---|-----------|-----------|-----------|
| 6 | -1.623973 | 0.537478  | 0.236907  |
| 8 | -1.215227 | 1.216083  | 2.864954  |
| 6 | -2.331126 | 1.279436  | 1.164983  |
| 7 | -0.167630 | 0.678412  | 2.497176  |
| 6 | 0.275643  | 0.191415  | 1.481623  |
| 1 | -2.298163 | 2.358913  | 1.142920  |
| 1 | -3.159231 | 0.813630  | 1.683021  |
| 6 | -0.854568 | 1.190885  | -0.847098 |
| 8 | -0.330759 | 0.606559  | -1.763684 |
| 8 | -0.786634 | 2.532928  | -0.719722 |
| 6 | -0.069015 | 3.203060  | -1.753847 |
| 1 | -0.560327 | 3.056376  | -2.717212 |
| 1 | 0.953897  | 2.827629  | -1.819455 |
| 1 | -0.074495 | 4.256168  | -1.480223 |
| 6 | -2.039580 | -0.904339 | -0.028984 |
| 1 | -1.243714 | -1.379755 | -0.617832 |
| 6 | -3.357239 | -1.036016 | -0.812686 |
| 1 | -4.142206 | -0.654963 | -0.147041 |
| 6 | -3.378850 | -0.222035 | -2.105654 |
| 1 | -4.317383 | -0.398238 | -2.637794 |
| 1 | -2.552907 | -0.503224 | -2.764073 |
| 1 | -3.305939 | 0.852024  | -1.915212 |
| 6 | -3.641885 | -2.511162 | -1.100897 |
| 1 | -4.614794 | -2.628722 | -1.585987 |
| 1 | -3.638599 | -3.098640 | -0.182482 |
| 1 | -2.881301 | -2.920098 | -1.775639 |
| 6 | 1.482761  | -0.220380 | 0.811997  |
| 6 | 1.739388  | -1.577481 | 0.548621  |
| 6 | 2.377837  | 0.781393  | 0.387561  |
| 6 | 2.870651  | -1.901603 | -0.188366 |
| 6 | 3.492218  | 0.404117  | -0.348121 |
| 6 | 3.744258  | -0.927891 | -0.663945 |
| 1 | 3.079741  | -2.946822 | -0.394147 |
| 1 | 4.186398  | 1.170029  | -0.680265 |



|   |           |           |           |
|---|-----------|-----------|-----------|
| 6 | 2.183576  | 2.219070  | 0.786344  |
| 1 | 2.457682  | 2.354050  | 1.837572  |
| 1 | 1.147103  | 2.541514  | 0.683215  |
| 1 | 2.816076  | 2.876731  | 0.187969  |
| 6 | 4.928944  | -1.306210 | -1.509960 |
| 1 | 5.750712  | -0.598319 | -1.384444 |
| 1 | 4.651384  | -1.308579 | -2.568706 |
| 1 | 5.293211  | -2.304994 | -1.261257 |
| 6 | 0.858052  | -2.670790 | 1.088257  |
| 1 | -0.098230 | -2.728030 | 0.565151  |
| 1 | 0.645433  | -2.512856 | 2.149257  |
| 1 | 1.348504  | -3.639735 | 0.987432  |
| 8 | -2.255362 | -1.602027 | 1.189486  |
| 1 | -1.508148 | -1.434988 | 1.766311  |

**TS-m-II**

|   |           |           |           |
|---|-----------|-----------|-----------|
| 6 | 1.714834  | 0.220097  | 0.356206  |
| 8 | 1.241195  | 0.810975  | 2.975534  |
| 6 | 2.480510  | 0.595158  | 1.448631  |
| 7 | 0.121145  | 0.635107  | 2.481635  |
| 1 | 2.835942  | 1.611710  | 1.537777  |
| 1 | 3.043378  | -0.159924 | 1.982021  |
| 6 | 1.387189  | 1.210652  | -0.685323 |
| 8 | 0.864723  | 0.935612  | -1.748563 |
| 6 | 1.722482  | -1.234610 | -0.109955 |
| 1 | 1.830003  | -1.860913 | 0.784610  |
| 8 | 0.501973  | -1.624673 | -0.704976 |
| 1 | 0.303581  | -0.957052 | -1.373118 |
| 6 | 2.899144  | -1.563128 | -1.062719 |
| 1 | 2.736175  | -0.977572 | -1.975793 |
| 6 | 4.266434  | -1.195250 | -0.487695 |
| 1 | 5.059242  | -1.507453 | -1.172534 |
| 1 | 4.439121  | -1.704250 | 0.467723  |
| 1 | 4.373939  | -0.121106 | -0.322463 |
| 6 | 2.860349  | -3.047382 | -1.429733 |
| 1 | 3.625872  | -3.282524 | -2.174232 |
| 1 | 1.885443  | -3.325306 | -1.829759 |
| 1 | 3.054238  | -3.665564 | -0.545319 |
| 6 | -0.367987 | 0.366021  | 1.415765  |
| 6 | -1.602971 | 0.088690  | 0.728006  |
| 6 | -2.229932 | 1.096179  | -0.016316 |
| 6 | -2.163065 | -1.204083 | 0.820626  |
| 6 | -3.409646 | 0.786858  | -0.689697 |
| 6 | -3.342735 | -1.456199 | 0.143012  |
| 6 | -3.974593 | -0.478394 | -0.628735 |
| 1 | -3.898314 | 1.563370  | -1.270752 |
| 1 | -3.784397 | -2.445983 | 0.209198  |
| 6 | -1.707504 | 2.505236  | -0.068992 |

|   |           |           |           |
|---|-----------|-----------|-----------|
| 1 | -0.714577 | 2.599464  | 0.370047  |
| 1 | -2.377697 | 3.172179  | 0.481299  |
| 1 | -1.666720 | 2.854209  | -1.103154 |
| 6 | -1.494216 | -2.282425 | 1.621788  |
| 1 | -1.221960 | -1.930296 | 2.619817  |
| 1 | -0.582890 | -2.592429 | 1.105896  |
| 1 | -2.148631 | -3.148707 | 1.728556  |
| 6 | -5.237106 | -0.806656 | -1.378536 |
| 1 | -5.692436 | 0.087882  | -1.806796 |
| 1 | -5.969757 | -1.283162 | -0.722042 |
| 1 | -5.027744 | -1.503116 | -2.195879 |
| 8 | 1.726092  | 2.471484  | -0.369663 |
| 6 | 1.522573  | 3.447026  | -1.389527 |
| 1 | 1.869698  | 4.387315  | -0.966907 |
| 1 | 2.098092  | 3.193109  | -2.281263 |
| 1 | 0.467967  | 3.516445  | -1.657873 |

11

|   |           |           |           |
|---|-----------|-----------|-----------|
| 6 | 1.696563  | 0.078209  | 0.407264  |
| 8 | 1.162156  | 0.337722  | 1.744669  |
| 6 | 0.461909  | -0.231717 | -0.434894 |
| 7 | -0.228568 | 0.319471  | 1.722418  |
| 6 | -0.637163 | 0.018489  | 0.557292  |
| 1 | 0.359274  | 0.410760  | -1.309133 |
| 1 | 0.440440  | -1.274207 | -0.759953 |
| 6 | 2.409638  | 1.391590  | 0.084903  |
| 8 | 3.532542  | 1.649173  | 0.420941  |
| 8 | 1.606491  | 2.254390  | -0.545928 |
| 6 | 2.151936  | 3.557479  | -0.767808 |
| 1 | 3.049726  | 3.493351  | -1.384123 |
| 1 | 2.402727  | 4.028417  | 0.183487  |
| 1 | 1.373458  | 4.117752  | -1.280121 |
| 6 | 2.669775  | -1.104386 | 0.568801  |
| 1 | 3.523255  | -0.738181 | 1.153626  |
| 8 | 1.990870  | -2.133035 | 1.263299  |
| 1 | 1.685751  | -1.749985 | 2.090311  |
| 6 | 3.181535  | -1.719494 | -0.737937 |
| 1 | 2.328872  | -2.240221 | -1.190274 |
| 6 | 3.710425  | -0.694628 | -1.741806 |
| 1 | 4.097946  | -1.209825 | -2.624178 |
| 1 | 4.519510  | -0.099445 | -1.311510 |
| 1 | 2.932058  | -0.006801 | -2.087614 |
| 6 | 4.250568  | -2.766473 | -0.419767 |
| 1 | 4.546534  | -3.303404 | -1.324866 |
| 1 | 3.880192  | -3.489142 | 0.308047  |
| 1 | 5.143879  | -2.286642 | -0.006158 |
| 6 | -2.078936 | -0.070359 | 0.233178  |
| 6 | -2.819235 | 1.108778  | 0.067721  |

|   |           |           |           |
|---|-----------|-----------|-----------|
| 6 | -2.673304 | -1.322770 | 0.053887  |
| 6 | -4.162107 | 1.008522  | -0.273927 |
| 6 | -4.024508 | -1.378106 | -0.280771 |
| 6 | -4.783474 | -0.226438 | -0.448512 |
| 1 | -4.741680 | 1.917931  | -0.405438 |
| 1 | -4.493655 | -2.349341 | -0.411022 |
| 6 | -1.884060 | -2.600025 | 0.200319  |
| 1 | -2.511916 | -3.397492 | 0.602145  |
| 1 | -1.022078 | -2.482619 | 0.859598  |
| 1 | -1.510837 | -2.937270 | -0.772622 |
| 6 | -6.250343 | -0.305096 | -0.781106 |
| 1 | -6.542579 | 0.488317  | -1.472989 |
| 1 | -6.856960 | -0.193542 | 0.123063  |
| 1 | -6.504913 | -1.264759 | -1.235343 |
| 6 | -2.176435 | 2.457305  | 0.269034  |
| 1 | -2.830418 | 3.255880  | -0.085363 |
| 1 | -1.221262 | 2.529696  | -0.258736 |
| 1 | -1.964284 | 2.627583  | 1.327564  |

12

|   |           |           |           |
|---|-----------|-----------|-----------|
| 6 | 1.664822  | 0.100505  | -0.100835 |
| 8 | 1.183272  | -0.240984 | -1.420152 |
| 6 | 0.407841  | 0.168854  | 0.772975  |
| 7 | -0.201866 | -0.341215 | -1.420343 |
| 6 | -0.652589 | -0.135401 | -0.249939 |
| 1 | 0.416311  | -0.557922 | 1.586792  |
| 1 | 0.241691  | 1.151008  | 1.218488  |
| 6 | 2.308600  | 1.483724  | -0.275225 |
| 8 | 3.478648  | 1.734081  | -0.125498 |
| 8 | 1.405609  | 2.386083  | -0.644896 |
| 6 | 1.899375  | 3.698589  | -0.923675 |
| 1 | 1.026762  | 4.284901  | -1.200729 |
| 1 | 2.615066  | 3.665066  | -1.745951 |
| 1 | 2.383713  | 4.119332  | -0.041326 |
| 6 | 2.734611  | -0.908022 | 0.369475  |
| 1 | 3.519365  | -0.923525 | -0.400052 |
| 8 | 3.248441  | -0.428475 | 1.599459  |
| 1 | 3.792685  | 0.335539  | 1.390177  |
| 6 | 2.273941  | -2.353431 | 0.604643  |
| 1 | 1.519654  | -2.337461 | 1.401376  |
| 6 | 1.674679  | -3.031867 | -0.629279 |
| 1 | 1.500513  | -4.089280 | -0.410971 |
| 1 | 2.363602  | -2.974114 | -1.477111 |
| 1 | 0.729632  | -2.595049 | -0.944636 |
| 6 | 3.463013  | -3.172401 | 1.117388  |
| 1 | 3.144014  | -4.189054 | 1.361488  |
| 1 | 3.903975  | -2.719719 | 2.004516  |
| 1 | 4.237227  | -3.242912 | 0.345191  |

|   |           |           |           |
|---|-----------|-----------|-----------|
| 6 | -2.102193 | -0.163761 | 0.055673  |
| 6 | -2.688043 | -1.333600 | 0.551250  |
| 6 | -2.856454 | 1.003746  | -0.108408 |
| 6 | -4.038835 | -1.314451 | 0.883463  |
| 6 | -4.204220 | 0.981019  | 0.235380  |
| 6 | -4.812304 | -0.167477 | 0.733067  |
| 1 | -4.499223 | -2.219659 | 1.268937  |
| 1 | -4.794746 | 1.884281  | 0.111299  |
| 6 | -2.226248 | 2.252065  | -0.670577 |
| 1 | -2.922869 | 3.091116  | -0.632313 |
| 1 | -1.927298 | 2.095488  | -1.710195 |
| 1 | -1.320899 | 2.530406  | -0.123898 |
| 6 | -6.280282 | -0.178678 | 1.069880  |
| 1 | -6.497721 | -0.883269 | 1.875492  |
| 1 | -6.872645 | -0.478208 | 0.199544  |
| 1 | -6.624601 | 0.810486  | 1.379183  |
| 6 | -1.883966 | -2.600510 | 0.689316  |
| 1 | -2.459263 | -3.375732 | 1.197585  |
| 1 | -0.962052 | -2.440849 | 1.255822  |
| 1 | -1.592341 | -2.980513 | -0.293333 |

13

|   |           |           |           |
|---|-----------|-----------|-----------|
| 6 | -1.227507 | 0.121199  | 0.517217  |
| 8 | -1.298205 | -0.271418 | 2.845632  |
| 6 | -2.068058 | 0.316591  | 1.780029  |
| 7 | 0.002966  | -0.421801 | 2.439510  |
| 6 | 0.124935  | -0.192770 | 1.190879  |
| 1 | -2.228308 | 1.370206  | 2.009748  |
| 1 | -3.018274 | -0.212959 | 1.741752  |
| 6 | -1.062145 | 1.323915  | -0.397421 |
| 8 | -0.470100 | 1.280459  | -1.441355 |
| 8 | -1.629862 | 2.437273  | 0.082068  |
| 6 | -1.537168 | 3.586251  | -0.761498 |
| 1 | -2.022668 | 3.389984  | -1.719135 |
| 1 | -0.493411 | 3.848860  | -0.938566 |
| 1 | -2.047465 | 4.383991  | -0.227371 |
| 6 | -1.691638 | -1.117335 | -0.317819 |
| 1 | -0.938385 | -1.268574 | -1.104000 |
| 6 | -3.086244 | -1.031962 | -0.968562 |
| 1 | -3.805862 | -1.078243 | -0.142977 |
| 6 | -3.377597 | 0.225909  | -1.786574 |
| 1 | -4.358189 | 0.125363  | -2.258576 |
| 1 | -2.636185 | 0.374649  | -2.575068 |
| 1 | -3.413114 | 1.127492  | -1.170248 |
| 6 | -3.294207 | -2.277090 | -1.836976 |
| 1 | -4.318315 | -2.310733 | -2.217696 |
| 1 | -3.105090 | -3.187856 | -1.269482 |
| 1 | -2.617538 | -2.257040 | -2.698301 |

|   |           |           |           |
|---|-----------|-----------|-----------|
| 6 | 1.463359  | -0.222448 | 0.536584  |
| 6 | 2.041976  | -1.430329 | 0.109479  |
| 6 | 2.164146  | 0.979487  | 0.375100  |
| 6 | 3.279631  | -1.398501 | -0.520642 |
| 6 | 3.403879  | 0.964279  | -0.259528 |
| 6 | 3.971614  | -0.209329 | -0.730862 |
| 1 | 3.725186  | -2.334178 | -0.845837 |
| 1 | 3.940195  | 1.901774  | -0.377994 |
| 6 | 1.645362  | 2.303069  | 0.878639  |
| 1 | 2.421828  | 2.817971  | 1.449006  |
| 1 | 0.777198  | 2.199670  | 1.529263  |
| 1 | 1.372917  | 2.946335  | 0.037383  |
| 6 | 5.293359  | -0.204287 | -1.451283 |
| 1 | 5.139777  | -0.211838 | -2.534929 |
| 1 | 5.887208  | -1.085171 | -1.196661 |
| 1 | 5.877601  | 0.684568  | -1.204884 |
| 6 | 1.386452  | -2.766306 | 0.349050  |
| 1 | 0.519401  | -2.921686 | -0.298548 |
| 1 | 1.067939  | -2.863805 | 1.390685  |
| 1 | 2.088203  | -3.576113 | 0.145539  |
| 8 | -1.782605 | -2.244763 | 0.530660  |
| 1 | -0.970129 | -2.344525 | 1.029400  |

14

|   |           |           |           |
|---|-----------|-----------|-----------|
| 6 | 1.261589  | 0.057442  | 0.463465  |
| 8 | 1.301281  | 0.840493  | 2.707266  |
| 6 | 2.143148  | 0.267302  | 1.701933  |
| 7 | -0.010592 | 0.691168  | 2.338080  |
| 1 | 2.976692  | 0.946724  | 1.548331  |
| 1 | 2.510828  | -0.694000 | 2.074165  |
| 6 | 1.390256  | 1.129371  | -0.613889 |
| 8 | 0.968792  | 0.993363  | -1.738337 |
| 6 | 1.451405  | -1.341612 | -0.198697 |
| 1 | 1.437475  | -2.066587 | 0.623553  |
| 8 | 0.358338  | -1.677284 | -1.018442 |
| 1 | 0.249473  | -0.958352 | -1.651487 |
| 6 | 2.762654  | -1.531766 | -0.997890 |
| 1 | 2.644692  | -0.953301 | -1.921249 |
| 6 | 4.037285  | -1.052977 | -0.302900 |
| 1 | 4.903938  | -1.286645 | -0.926163 |
| 1 | 4.184930  | -1.553375 | 0.659466  |
| 1 | 4.046007  | 0.026505  | -0.134504 |
| 6 | 2.890067  | -3.007656 | -1.380362 |
| 1 | 3.726162  | -3.158377 | -2.068148 |
| 1 | 1.977202  | -3.363589 | -1.858452 |
| 1 | 3.074143  | -3.620703 | -0.490885 |
| 6 | -0.112414 | 0.256095  | 1.144956  |
| 6 | -1.468391 | 0.082118  | 0.554076  |

|   |           |           |           |
|---|-----------|-----------|-----------|
| 6 | -2.099037 | 1.155590  | -0.082911 |
| 6 | -2.136662 | -1.146175 | 0.698512  |
| 6 | -3.374681 | 0.968261  | -0.616472 |
| 6 | -3.407470 | -1.285051 | 0.160499  |
| 6 | -4.040078 | -0.243232 | -0.515083 |
| 1 | -3.861886 | 1.804907  | -1.109492 |
| 1 | -3.924900 | -2.233267 | 0.276788  |
| 6 | -1.465955 | 2.519154  | -0.209349 |
| 1 | -0.680703 | 2.680765  | 0.530438  |
| 1 | -2.217598 | 3.298373  | -0.067457 |
| 1 | -1.037396 | 2.647264  | -1.207446 |
| 6 | -1.502799 | -2.310551 | 1.410759  |
| 1 | -0.942769 | -1.988541 | 2.290696  |
| 1 | -0.817696 | -2.823972 | 0.731592  |
| 1 | -2.261935 | -3.024662 | 1.734623  |
| 6 | -5.410574 | -0.438037 | -1.107761 |
| 1 | -5.841837 | 0.509969  | -1.435045 |
| 1 | -6.092434 | -0.889674 | -0.382463 |
| 1 | -5.366416 | -1.103791 | -1.975050 |
| 8 | 1.985872  | 2.237526  | -0.186755 |
| 6 | 2.092691  | 3.303801  | -1.135760 |
| 1 | 2.644881  | 4.089971  | -0.627556 |
| 1 | 2.624819  | 2.967738  | -2.026208 |
| 1 | 1.099571  | 3.654822  | -1.418303 |

$\omega$ B97X-D/6-311G(d,p) gas phase cartesian coordinates of the stationary points involved in the Mg(II)-promoted *zw*-type 32CA reaction of MNO **9** with BHA **10**.

**17**

|    |           |           |           |
|----|-----------|-----------|-----------|
| 6  | -2.008841 | 0.152212  | -0.617490 |
| 6  | -0.983582 | 0.048123  | -1.464591 |
| 1  | -0.682943 | -0.909099 | -1.869795 |
| 1  | -0.419352 | 0.917097  | -1.779133 |
| 6  | -2.345929 | 1.518598  | -0.132517 |
| 8  | -3.444240 | 1.874879  | 0.303987  |
| 8  | -1.357352 | 2.382644  | -0.188988 |
| 6  | -1.641697 | 3.732498  | 0.211307  |
| 1  | -0.709441 | 4.272060  | 0.069771  |
| 1  | -1.948731 | 3.757196  | 1.256591  |
| 1  | -2.432438 | 4.152550  | -0.410375 |
| 6  | -2.859710 | -1.008453 | -0.067891 |
| 1  | -2.560993 | -1.075194 | 0.999373  |
| 8  | -4.212520 | -0.768706 | -0.180440 |
| 6  | -2.508004 | -2.379220 | -0.686574 |
| 1  | -1.418228 | -2.506320 | -0.667674 |
| 6  | -3.117726 | -3.478797 | 0.184130  |
| 1  | -2.924919 | -4.467351 | -0.241364 |
| 1  | -4.198312 | -3.334828 | 0.254284  |
| 1  | -2.703479 | -3.460368 | 1.196897  |
| 6  | -3.018881 | -2.499700 | -2.123037 |
| 1  | -2.754751 | -3.473441 | -2.544875 |
| 1  | -2.615611 | -1.726183 | -2.781651 |
| 1  | -4.105858 | -2.401076 | -2.128578 |
| 12 | -5.153856 | 0.768953  | 0.234470  |
| 17 | -7.107422 | 1.771288  | 0.560461  |

**MC-Mg**

|   |           |           |           |
|---|-----------|-----------|-----------|
| 6 | 2.216340  | -1.379899 | -0.979423 |
| 8 | 0.459212  | 2.503456  | -0.142274 |
| 6 | 1.723099  | -2.279690 | -1.828456 |
| 7 | -0.631285 | 1.928725  | -0.176873 |
| 6 | -1.650791 | 1.402956  | -0.201614 |
| 1 | 1.864925  | -2.187532 | -2.898270 |
| 1 | 1.156746  | -3.132211 | -1.472947 |
| 6 | 2.955596  | -0.212641 | -1.531052 |
| 8 | 3.119457  | 0.849551  | -0.937529 |
| 8 | 3.459382  | -0.391367 | -2.735832 |
| 6 | 4.153380  | 0.722934  | -3.315222 |
| 1 | 4.999884  | 1.005350  | -2.689524 |
| 1 | 3.480837  | 1.574864  | -3.419457 |
| 1 | 4.490179  | 0.374909  | -4.288037 |
| 6 | 2.004976  | -1.328835 | 0.538185  |

|    |           |           |           |
|----|-----------|-----------|-----------|
| 1  | 3.017830  | -1.192312 | 0.978616  |
| 8  | 1.184096  | -0.247943 | 0.816522  |
| 6  | 1.485156  | -2.645916 | 1.145405  |
| 1  | 0.585288  | -2.949083 | 0.595048  |
| 6  | 2.525941  | -3.764818 | 1.059029  |
| 1  | 2.129971  | -4.694755 | 1.476482  |
| 1  | 3.416574  | -3.498059 | 1.638043  |
| 1  | 2.846800  | -3.965946 | 0.034237  |
| 6  | 1.076516  | -2.407161 | 2.597656  |
| 1  | 0.681047  | -3.325179 | 3.042465  |
| 1  | 0.322955  | -1.622983 | 2.660710  |
| 1  | 1.940026  | -2.088748 | 3.192023  |
| 6  | -2.887189 | 0.691526  | -0.210568 |
| 6  | -4.084968 | 1.390319  | 0.010267  |
| 6  | -2.856617 | -0.698700 | -0.418435 |
| 6  | -5.266257 | 0.662113  | 0.016792  |
| 6  | -4.067712 | -1.376393 | -0.395635 |
| 6  | -5.276880 | -0.717045 | -0.183090 |
| 1  | -6.202633 | 1.182417  | 0.190556  |
| 1  | -4.067136 | -2.451786 | -0.544112 |
| 6  | -1.558026 | -1.409127 | -0.669359 |
| 1  | -1.231897 | -1.248719 | -1.702996 |
| 1  | -1.671992 | -2.484189 | -0.519482 |
| 1  | -0.751867 | -1.043227 | -0.022910 |
| 6  | -6.570769 | -1.484640 | -0.189568 |
| 1  | -6.469316 | -2.430711 | 0.346757  |
| 1  | -6.870470 | -1.718250 | -1.215778 |
| 1  | -7.377228 | -0.912802 | 0.272236  |
| 6  | -4.078832 | 2.875783  | 0.242501  |
| 1  | -5.090753 | 3.249861  | 0.399520  |
| 1  | -3.649343 | 3.407412  | -0.611483 |
| 1  | -3.481656 | 3.133424  | 1.121908  |
| 12 | 2.043164  | 1.462851  | 0.740274  |
| 17 | 3.262200  | 2.738828  | 2.138381  |

**TS-o-I-Mg**

|   |          |           |           |
|---|----------|-----------|-----------|
| 6 | 0.000000 | 0.000000  | 0.000000  |
| 7 | 0.000000 | 0.000000  | 1.200876  |
| 8 | 0.854990 | 0.000000  | 2.134963  |
| 6 | 2.768931 | 0.202028  | 0.501777  |
| 6 | 2.016610 | 0.099689  | -0.631286 |
| 1 | 1.764902 | 0.990371  | -1.193009 |
| 1 | 2.010777 | -0.848290 | -1.159534 |
| 6 | 2.991296 | 1.536925  | 1.131295  |
| 8 | 3.816426 | 1.764401  | 1.976289  |
| 8 | 2.156622 | 2.474411  | 0.648863  |
| 6 | 2.275377 | 3.765701  | 1.245717  |
| 1 | 3.279092 | 4.166750  | 1.097369  |
| 1 | 2.067689 | 3.709106  | 2.315298  |



|    |           |           |           |
|----|-----------|-----------|-----------|
| 1  | 1.536817  | 4.389552  | 0.746741  |
| 6  | 3.522424  | -0.997662 | 1.067624  |
| 1  | 3.941547  | -0.674317 | 2.035134  |
| 8  | 2.684006  | -2.096070 | 1.199018  |
| 6  | 4.729359  | -1.345953 | 0.165051  |
| 1  | 4.306070  | -1.682802 | -0.790583 |
| 6  | 5.647059  | -0.149489 | -0.087972 |
| 1  | 6.526078  | -0.457736 | -0.660289 |
| 1  | 5.991452  | 0.284507  | 0.855456  |
| 1  | 5.147222  | 0.641681  | -0.654711 |
| 6  | 5.500664  | -2.508071 | 0.785227  |
| 1  | 6.302348  | -2.841769 | 0.120027  |
| 1  | 4.832038  | -3.346251 | 0.981890  |
| 1  | 5.958531  | -2.200582 | 1.732461  |
| 6  | -0.817187 | -0.177682 | -1.168693 |
| 6  | -1.273651 | 0.939434  | -1.881304 |
| 6  | -1.072981 | -1.495033 | -1.590750 |
| 6  | -2.017124 | 0.712175  | -3.032282 |
| 6  | -1.820253 | -1.665621 | -2.746553 |
| 6  | -2.298984 | -0.577596 | -3.477126 |
| 1  | -2.383844 | 1.562544  | -3.598520 |
| 1  | -2.032309 | -2.672546 | -3.091958 |
| 6  | -0.565921 | -2.669184 | -0.798003 |
| 1  | -0.748207 | -3.605311 | -1.325829 |
| 1  | -1.074334 | -2.730148 | 0.170724  |
| 1  | 0.509211  | -2.595769 | -0.600684 |
| 6  | -3.126932 | -0.800409 | -4.713148 |
| 1  | -3.121727 | 0.077555  | -5.361252 |
| 1  | -4.166159 | -1.008631 | -4.440606 |
| 1  | -2.759764 | -1.654396 | -5.286136 |
| 6  | -1.004561 | 2.334007  | -1.386093 |
| 1  | -1.149194 | 3.065193  | -2.182415 |
| 1  | 0.009060  | 2.442006  | -0.991412 |
| 1  | -1.691448 | 2.581876  | -0.570800 |
| 12 | 1.263542  | -2.026912 | 2.407559  |
| 17 | -0.289251 | -3.277346 | 3.391047  |

**TS-o-II-Mg**

|   |          |           |           |
|---|----------|-----------|-----------|
| 8 | 0.000000 | 0.000000  | 0.000000  |
| 7 | 0.000000 | 0.000000  | 1.250017  |
| 6 | 0.874553 | 0.000000  | 2.095610  |
| 6 | 2.613295 | 0.251669  | 1.147837  |
| 6 | 2.457866 | -0.522674 | 0.026499  |
| 1 | 3.157200 | -0.184259 | 1.980139  |
| 1 | 2.639899 | 1.332686  | 1.056201  |
| 6 | 2.181661 | 0.073326  | -1.305431 |
| 8 | 1.532689 | -0.487123 | -2.184728 |
| 8 | 2.743645 | 1.248344  | -1.493526 |
| 6 | 2.461135 | 1.896693  | -2.745200 |

|    |           |           |           |
|----|-----------|-----------|-----------|
| 1  | 2.981835  | 2.849051  | -2.696815 |
| 1  | 1.386500  | 2.043705  | -2.853762 |
| 1  | 2.832505  | 1.292152  | -3.572141 |
| 6  | 2.532774  | -2.050733 | 0.116919  |
| 1  | 2.842856  | -2.260966 | 1.161366  |
| 8  | 1.304623  | -2.604746 | -0.141890 |
| 6  | 3.654559  | -2.614492 | -0.785560 |
| 1  | 3.366200  | -2.409401 | -1.823982 |
| 6  | 5.004634  | -1.954640 | -0.502121 |
| 1  | 5.792769  | -2.408881 | -1.108065 |
| 1  | 5.283589  | -2.081014 | 0.550400  |
| 1  | 4.998761  | -0.881509 | -0.718086 |
| 6  | 3.723887  | -4.127497 | -0.600986 |
| 1  | 4.436823  | -4.574043 | -1.299619 |
| 1  | 2.742135  | -4.573459 | -0.761615 |
| 1  | 4.048974  | -4.374510 | 0.416382  |
| 6  | 1.015472  | -0.286977 | 3.506910  |
| 6  | 0.689655  | -1.581474 | 3.956910  |
| 6  | 1.512901  | 0.693469  | 4.380076  |
| 6  | 0.876650  | -1.861147 | 5.305670  |
| 6  | 1.673929  | 0.362120  | 5.717939  |
| 6  | 1.368796  | -0.910658 | 6.196109  |
| 1  | 0.624853  | -2.851286 | 5.672417  |
| 1  | 2.042398  | 1.115727  | 6.407122  |
| 6  | 1.866548  | 2.071424  | 3.888385  |
| 1  | 1.884677  | 2.783279  | 4.714548  |
| 1  | 1.150939  | 2.429196  | 3.144624  |
| 1  | 2.858691  | 2.078716  | 3.425763  |
| 6  | 1.588688  | -1.258759 | 7.643144  |
| 1  | 0.872336  | -2.008573 | 7.984083  |
| 1  | 1.496990  | -0.378696 | 8.282539  |
| 1  | 2.592587  | -1.670563 | 7.786678  |
| 6  | 0.118270  | -2.618381 | 3.030385  |
| 1  | -0.910031 | -2.353372 | 2.762518  |
| 1  | 0.094469  | -3.594053 | 3.517062  |
| 1  | 0.668690  | -2.709043 | 2.088053  |
| 12 | 0.057925  | -1.720083 | -1.280667 |
| 17 | -1.794683 | -2.248533 | -2.419305 |

**TS-m-I-Mg**

|   |           |           |           |
|---|-----------|-----------|-----------|
| 6 | 0.663340  | 0.941748  | -0.671401 |
| 8 | 1.694229  | -1.493932 | -1.489235 |
| 6 | 1.442449  | 0.639025  | -1.766890 |
| 7 | 0.593903  | -1.760785 | -0.892110 |
| 6 | -0.254108 | -1.046000 | -0.407147 |
| 1 | 1.022053  | 0.586469  | -2.762281 |
| 1 | 2.522158  | 0.718368  | -1.707164 |
| 6 | -0.676687 | 1.575044  | -0.850119 |
| 8 | -1.290061 | 2.109976  | 0.034879  |

|    |           |           |           |
|----|-----------|-----------|-----------|
| 8  | -1.141016 | 1.486532  | -2.108926 |
| 6  | -2.445466 | 2.032095  | -2.316886 |
| 1  | -2.454297 | 3.098322  | -2.087809 |
| 1  | -3.173845 | 1.522549  | -1.682726 |
| 1  | -2.667542 | 1.865351  | -3.368674 |
| 6  | 1.377500  | 1.149778  | 0.676085  |
| 1  | 0.589175  | 1.292447  | 1.428991  |
| 6  | 2.236105  | 2.438482  | 0.683173  |
| 1  | 3.063918  | 2.262448  | -0.019268 |
| 6  | 1.483032  | 3.692924  | 0.240737  |
| 1  | 2.125621  | 4.571909  | 0.339895  |
| 1  | 0.591783  | 3.851447  | 0.853770  |
| 1  | 1.164272  | 3.638324  | -0.804355 |
| 6  | 2.832918  | 2.630171  | 2.076544  |
| 1  | 3.541051  | 3.463466  | 2.087330  |
| 1  | 3.346459  | 1.725658  | 2.402698  |
| 1  | 2.040558  | 2.854491  | 2.799619  |
| 6  | -1.577017 | -1.061042 | 0.152381  |
| 6  | -1.777110 | -0.877581 | 1.528421  |
| 6  | -2.662423 | -1.197966 | -0.742710 |
| 6  | -3.088462 | -0.794797 | 1.987431  |
| 6  | -3.944248 | -1.108942 | -0.229249 |
| 6  | -4.176580 | -0.889079 | 1.130987  |
| 1  | -3.257444 | -0.650942 | 3.050092  |
| 1  | -4.789644 | -1.219331 | -0.901554 |
| 6  | -2.436631 | -1.489702 | -2.201241 |
| 1  | -3.377061 | -1.449424 | -2.752317 |
| 1  | -2.010854 | -2.489295 | -2.328495 |
| 1  | -1.740735 | -0.778440 | -2.649970 |
| 6  | -5.581765 | -0.745203 | 1.646638  |
| 1  | -5.943982 | 0.273337  | 1.475939  |
| 1  | -5.635686 | -0.942110 | 2.718529  |
| 1  | -6.263547 | -1.428090 | 1.135067  |
| 6  | -0.645719 | -0.827972 | 2.517434  |
| 1  | -0.690233 | -1.712573 | 3.160019  |
| 1  | -0.744567 | 0.048967  | 3.161536  |
| 1  | 0.340712  | -0.794872 | 2.051353  |
| 8  | 2.160393  | 0.052707  | 0.987129  |
| 12 | 3.103306  | -1.244105 | 0.050972  |
| 17 | 5.000486  | -2.391580 | -0.004365 |

**TS-m-II-Mg**

|   |          |           |           |
|---|----------|-----------|-----------|
| 8 | 0.000000 | 0.000000  | 0.000000  |
| 7 | 0.000000 | 0.000000  | 1.239102  |
| 6 | 0.781517 | 0.000000  | 2.148505  |
| 6 | 2.630771 | 0.054469  | 0.636548  |
| 6 | 1.871287 | -0.069859 | -0.522114 |
| 1 | 1.761681 | -1.031428 | -1.004054 |
| 1 | 1.756617 | 0.798039  | -1.158265 |

|    |           |           |           |
|----|-----------|-----------|-----------|
| 6  | 3.216134  | -1.143178 | 1.221982  |
| 8  | 3.897736  | -1.169346 | 2.260587  |
| 6  | 3.272219  | 1.415251  | 0.990492  |
| 1  | 2.598408  | 2.169999  | 0.541205  |
| 8  | 3.397063  | 1.643918  | 2.341486  |
| 6  | 4.648793  | 1.581479  | 0.284716  |
| 1  | 5.318206  | 0.826862  | 0.724371  |
| 6  | 4.613540  | 1.367172  | -1.228370 |
| 1  | 5.596603  | 1.567623  | -1.662819 |
| 1  | 3.901698  | 2.053035  | -1.701851 |
| 1  | 4.333903  | 0.346989  | -1.502375 |
| 6  | 5.213534  | 2.964473  | 0.608290  |
| 1  | 6.227356  | 3.075890  | 0.213405  |
| 1  | 5.230489  | 3.133464  | 1.684532  |
| 1  | 4.589642  | 3.742962  | 0.153875  |
| 6  | 1.003129  | 0.009926  | 3.565966  |
| 6  | 1.236842  | -1.204495 | 4.241013  |
| 6  | 1.009507  | 1.243526  | 4.258273  |
| 6  | 1.543343  | -1.159118 | 5.596471  |
| 6  | 1.314205  | 1.227199  | 5.611311  |
| 6  | 1.605578  | 0.043711  | 6.292876  |
| 1  | 1.750086  | -2.087048 | 6.119482  |
| 1  | 1.340466  | 2.167872  | 6.151472  |
| 6  | 1.090843  | -2.533524 | 3.553892  |
| 1  | 0.088740  | -2.931868 | 3.739893  |
| 1  | 1.812148  | -3.252722 | 3.945987  |
| 1  | 1.210407  | -2.461925 | 2.472764  |
| 6  | 0.731649  | 2.530255  | 3.542010  |
| 1  | -0.170706 | 2.456859  | 2.930083  |
| 1  | 1.583679  | 2.744921  | 2.889143  |
| 1  | 0.605508  | 3.348772  | 4.251525  |
| 6  | 2.029578  | 0.075186  | 7.731440  |
| 1  | 1.758220  | -0.847069 | 8.248469  |
| 1  | 1.583087  | 0.918719  | 8.261184  |
| 1  | 3.118184  | 0.180898  | 7.777291  |
| 8  | 2.991907  | -2.277993 | 0.572392  |
| 6  | 3.612844  | -3.461046 | 1.087051  |
| 1  | 3.296494  | -4.260569 | 0.421964  |
| 1  | 4.697743  | -3.354714 | 1.071117  |
| 1  | 3.285773  | -3.657466 | 2.107674  |
| 12 | 4.007050  | 0.372008  | 3.573770  |
| 17 | 5.111042  | 0.114374  | 5.505074  |

20

|   |           |           |           |
|---|-----------|-----------|-----------|
| 6 | 1.472776  | -0.536008 | -0.092284 |
| 8 | 1.116212  | 0.577617  | -0.999988 |
| 6 | 0.163775  | -0.804860 | 0.635639  |
| 7 | -0.300395 | 0.733188  | -1.057603 |
| 6 | -0.822840 | -0.022568 | -0.177624 |

|    |           |           |           |
|----|-----------|-----------|-----------|
| 1  | -0.092832 | -1.859817 | 0.701394  |
| 1  | 0.182811  | -0.382578 | 1.645354  |
| 6  | 1.948085  | -1.627936 | -1.051422 |
| 8  | 2.971638  | -1.555057 | -1.670100 |
| 8  | 1.087226  | -2.647346 | -1.147358 |
| 6  | 1.470843  | -3.695048 | -2.044029 |
| 1  | 2.407994  | -4.146253 | -1.714942 |
| 1  | 1.595751  | -3.301866 | -3.053363 |
| 1  | 0.661943  | -4.420779 | -2.010049 |
| 6  | 2.605710  | 0.021366  | 0.826430  |
| 1  | 3.504876  | 0.066939  | 0.186938  |
| 8  | 2.220199  | 1.269725  | 1.272035  |
| 6  | 2.929946  | -0.908722 | 2.009627  |
| 1  | 2.051248  | -0.903693 | 2.666809  |
| 6  | 3.234886  | -2.352137 | 1.603315  |
| 1  | 3.553077  | -2.928622 | 2.475557  |
| 1  | 4.042354  | -2.390641 | 0.865608  |
| 1  | 2.364815  | -2.865963 | 1.182648  |
| 6  | 4.096891  | -0.309429 | 2.793450  |
| 1  | 4.283978  | -0.878490 | 3.708243  |
| 1  | 3.882820  | 0.726131  | 3.057731  |
| 1  | 5.012190  | -0.329868 | 2.191455  |
| 6  | -2.279237 | 0.001594  | 0.078195  |
| 6  | -3.091369 | -1.016993 | -0.430612 |
| 6  | -2.805416 | 1.031080  | 0.866960  |
| 6  | -4.448089 | -0.991780 | -0.128898 |
| 6  | -4.167780 | 1.013706  | 1.147159  |
| 6  | -5.002994 | 0.013335  | 0.658851  |
| 1  | -5.089320 | -1.775809 | -0.520757 |
| 1  | -4.587580 | 1.803899  | 1.762273  |
| 6  | -1.929861 | 2.144625  | 1.385359  |
| 1  | -2.457234 | 2.740485  | 2.130930  |
| 1  | -1.633438 | 2.816977  | 0.574006  |
| 1  | -1.017892 | 1.762541  | 1.856857  |
| 6  | -6.480538 | 0.035593  | 0.947634  |
| 1  | -6.893512 | -0.974623 | 0.984316  |
| 1  | -7.015070 | 0.584010  | 0.165802  |
| 1  | -6.692047 | 0.526752  | 1.899495  |
| 6  | -2.516223 | -2.088008 | -1.321256 |
| 1  | -3.266145 | -2.845374 | -1.553279 |
| 1  | -1.658817 | -2.588103 | -0.862618 |
| 1  | -2.165620 | -1.655870 | -2.262866 |
| 12 | 1.510194  | 2.428892  | -0.023478 |
| 17 | 0.947129  | 4.490950  | -0.589156 |

21

|   |           |           |           |
|---|-----------|-----------|-----------|
| 6 | 1.081238  | -0.442386 | -0.294592 |
| 8 | 0.882386  | 0.978252  | -0.552477 |
| 6 | -0.292694 | -1.013512 | -0.578880 |

|    |           |           |           |
|----|-----------|-----------|-----------|
| 7  | -0.474391 | 1.304808  | -0.361617 |
| 6  | -1.139889 | 0.219967  | -0.374917 |
| 1  | -0.381988 | -1.360321 | -1.613400 |
| 1  | -0.578022 | -1.829352 | 0.081464  |
| 6  | 1.499679  | -0.500458 | 1.166211  |
| 8  | 2.165811  | 0.393225  | 1.661930  |
| 8  | 1.150254  | -1.587866 | 1.811104  |
| 6  | 1.635879  | -1.718734 | 3.159466  |
| 1  | 1.254789  | -2.673526 | 3.510029  |
| 1  | 1.259454  | -0.898457 | 3.770310  |
| 1  | 2.725546  | -1.709377 | 3.161858  |
| 6  | 2.335286  | -0.804899 | -1.180413 |
| 1  | 1.925174  | -0.783095 | -2.211924 |
| 8  | 3.285524  | 0.150191  | -0.979504 |
| 6  | 2.888596  | -2.221668 | -0.924287 |
| 1  | 3.274353  | -2.232642 | 0.104110  |
| 6  | 1.855462  | -3.338402 | -1.078070 |
| 1  | 2.344581  | -4.314844 | -1.033258 |
| 1  | 1.349197  | -3.273674 | -2.047741 |
| 1  | 1.098826  | -3.320610 | -0.290690 |
| 6  | 4.072958  | -2.445114 | -1.863824 |
| 1  | 4.575056  | -3.389997 | -1.638453 |
| 1  | 4.786744  | -1.627314 | -1.770161 |
| 1  | 3.732123  | -2.484953 | -2.904660 |
| 6  | -2.611678 | 0.203734  | -0.218568 |
| 6  | -3.432147 | 0.421626  | -1.330599 |
| 6  | -3.155994 | -0.072457 | 1.040932  |
| 6  | -4.810604 | 0.352154  | -1.158972 |
| 6  | -4.539352 | -0.130165 | 1.168455  |
| 6  | -5.381931 | 0.078511  | 0.080367  |
| 1  | -5.455904 | 0.518360  | -2.016449 |
| 1  | -4.970641 | -0.339273 | 2.142957  |
| 6  | -2.263509 | -0.272106 | 2.239667  |
| 1  | -2.853446 | -0.469330 | 3.135592  |
| 1  | -1.655294 | 0.618332  | 2.422295  |
| 1  | -1.577568 | -1.113738 | 2.100091  |
| 6  | -6.878004 | 0.044186  | 0.246725  |
| 1  | -7.370977 | -0.301031 | -0.664401 |
| 1  | -7.261381 | 1.044222  | 0.471887  |
| 1  | -7.172174 | -0.615160 | 1.065835  |
| 6  | -2.837786 | 0.736068  | -2.679028 |
| 1  | -3.617073 | 0.829228  | -3.436294 |
| 1  | -2.146525 | -0.046954 | -3.005683 |
| 1  | -2.275195 | 1.672098  | -2.647487 |
| 12 | 2.846713  | 1.689642  | 0.056945  |
| 17 | 3.470661  | 3.766044  | 0.556341  |

22

|   |          |          |           |
|---|----------|----------|-----------|
| 6 | 0.555892 | 0.962732 | -0.362006 |
|---|----------|----------|-----------|

|    |           |           |           |
|----|-----------|-----------|-----------|
| 8  | 1.687905  | -0.421710 | -1.864265 |
| 6  | 1.563533  | 0.975543  | -1.505326 |
| 7  | 0.446575  | -1.067940 | -1.533898 |
| 6  | -0.202822 | -0.314217 | -0.734043 |
| 1  | 1.210218  | 1.519437  | -2.381129 |
| 1  | 2.552601  | 1.324645  | -1.214059 |
| 6  | -0.384479 | 2.147139  | -0.272013 |
| 8  | -1.221042 | 2.268225  | 0.578168  |
| 8  | -0.179493 | 3.041623  | -1.248714 |
| 6  | -0.993808 | 4.215288  | -1.187192 |
| 1  | -0.820073 | 4.743160  | -0.247982 |
| 1  | -2.049754 | 3.951418  | -1.259346 |
| 1  | -0.692341 | 4.826190  | -2.034363 |
| 6  | 1.278972  | 0.683732  | 1.037201  |
| 1  | 0.453422  | 0.595518  | 1.764634  |
| 6  | 2.213351  | 1.824580  | 1.514682  |
| 1  | 3.074541  | 1.820420  | 0.833995  |
| 6  | 1.627927  | 3.237000  | 1.548504  |
| 1  | 2.341864  | 3.914861  | 2.023561  |
| 1  | 0.700002  | 3.270762  | 2.125216  |
| 1  | 1.430638  | 3.635858  | 0.550643  |
| 6  | 2.728504  | 1.445514  | 2.906108  |
| 1  | 3.498408  | 2.148150  | 3.236292  |
| 1  | 3.145893  | 0.439469  | 2.902368  |
| 1  | 1.910610  | 1.477911  | 3.634457  |
| 6  | -1.534543 | -0.750944 | -0.239110 |
| 6  | -1.643423 | -1.729503 | 0.764235  |
| 6  | -2.679951 | -0.193328 | -0.818053 |
| 6  | -2.912583 | -2.075693 | 1.210312  |
| 6  | -3.929460 | -0.581916 | -0.344192 |
| 6  | -4.067300 | -1.505928 | 0.680906  |
| 1  | -3.002753 | -2.826507 | 1.989453  |
| 1  | -4.816679 | -0.149274 | -0.797620 |
| 6  | -2.626064 | 0.794581  | -1.956672 |
| 1  | -3.296783 | 0.478663  | -2.758696 |
| 1  | -1.630700 | 0.895430  | -2.391440 |
| 1  | -2.954118 | 1.780933  | -1.618407 |
| 6  | -5.423081 | -1.881828 | 1.215087  |
| 1  | -5.645147 | -1.316309 | 2.125309  |
| 1  | -5.468826 | -2.943565 | 1.467356  |
| 1  | -6.210502 | -1.667840 | 0.489866  |
| 6  | -0.447160 | -2.449101 | 1.331159  |
| 1  | 0.347873  | -1.767784 | 1.640249  |
| 1  | -0.030739 | -3.134024 | 0.582450  |
| 1  | -0.738426 | -3.053835 | 2.190604  |
| 8  | 2.006131  | -0.473316 | 0.953706  |
| 12 | 2.493881  | -1.709162 | -0.349392 |
| 17 | 3.678737  | -3.534010 | -0.742722 |

|    |           |           |           |
|----|-----------|-----------|-----------|
| 6  | 1.569815  | -0.721133 | -0.231385 |
| 8  | 1.965916  | -3.021040 | -0.692208 |
| 6  | 2.649051  | -1.769674 | -0.518214 |
| 7  | 0.617500  | -2.803755 | -0.766000 |
| 1  | 3.373725  | -1.897232 | 0.282250  |
| 1  | 3.165283  | -1.539711 | -1.452665 |
| 6  | 1.476675  | -0.223313 | 1.188398  |
| 8  | 0.573880  | 0.516988  | 1.571254  |
| 6  | 1.667846  | 0.585791  | -1.156607 |
| 1  | 1.869840  | 0.159335  | -2.159241 |
| 8  | 0.508625  | 1.294403  | -1.144397 |
| 6  | 2.857952  | 1.510539  | -0.787129 |
| 1  | 2.619523  | 1.936683  | 0.198225  |
| 6  | 4.236044  | 0.852273  | -0.706925 |
| 1  | 4.996686  | 1.613737  | -0.515679 |
| 1  | 4.499400  | 0.364529  | -1.651073 |
| 1  | 4.312242  | 0.116744  | 0.096564  |
| 6  | 2.889924  | 2.665449  | -1.789520 |
| 1  | 3.637095  | 3.409415  | -1.499979 |
| 1  | 1.914333  | 3.145447  | -1.852548 |
| 1  | 3.154899  | 2.294971  | -2.786440 |
| 6  | 0.331088  | -1.585033 | -0.534459 |
| 6  | -1.099591 | -1.175250 | -0.459728 |
| 6  | -1.802875 | -1.309329 | 0.751949  |
| 6  | -1.764067 | -0.703588 | -1.613153 |
| 6  | -3.123935 | -0.864593 | 0.817471  |
| 6  | -3.080439 | -0.273388 | -1.494736 |
| 6  | -3.770152 | -0.319463 | -0.282977 |
| 1  | -3.652102 | -0.937658 | 1.762940  |
| 1  | -3.583767 | 0.112690  | -2.375454 |
| 6  | -1.202421 | -1.938155 | 1.985341  |
| 1  | -0.200416 | -2.330189 | 1.813120  |
| 1  | -1.824995 | -2.777943 | 2.302575  |
| 1  | -1.164832 | -1.219779 | 2.807753  |
| 6  | -1.066663 | -0.646707 | -2.943210 |
| 1  | -0.520257 | -1.571461 | -3.137981 |
| 1  | -0.358305 | 0.185567  | -2.940089 |
| 1  | -1.786706 | -0.493898 | -3.748193 |
| 6  | -5.152842 | 0.252144  | -0.159557 |
| 1  | -5.738287 | -0.278980 | 0.593465  |
| 1  | -5.688834 | 0.212268  | -1.109734 |
| 1  | -5.080664 | 1.300175  | 0.147940  |
| 8  | 2.438535  | -0.597874 | 1.996550  |
| 6  | 2.390884  | -0.090823 | 3.341748  |
| 1  | 3.260918  | -0.513319 | 3.835980  |
| 1  | 2.437610  | 0.997765  | 3.331325  |
| 1  | 1.470761  | -0.414221 | 3.827921  |
| 12 | -0.771907 | 1.391363  | 0.234712  |
| 17 | -2.339781 | 2.751129  | 1.069428  |
